# Supplementary material for: Proton-exchange mechanism of specific Cs+ adsorption via lattice defect sites of Prussian blue filled with coordination and crystallization water molecules
Source: Royal Society of Chemistry journal article supplement (doi:10.1039/c3dt51637g), 2013-01-01
Supplement: c3dt51637g.pdf [file c3dt51637g.pdf]

# Proton-exchange mechanism of specific Cs<sup>+</sup> adsorption *via* lattice defect sites of Prussian blue filled with coordination and crystallization water molecules

Manabu Ishizaki,<sup>a</sup> Sayori Akiba,<sup>a</sup> Asako Ohtani,<sup>a</sup> Yuji Hoshi,<sup>a</sup> Kenta Ono,<sup>a</sup> Mayu Matsuba,<sup>a</sup> Takanari Togashi,<sup>a</sup> Katsuhiko Kananizuka,<sup>a</sup> Masatomi Sakamoto,<sup>a,b</sup> Akira Takahashi,<sup>b</sup> Tohru Kawamoto,<sup>b</sup> Hisashi Tanaka,<sup>b</sup> Masayuki Watanabe,<sup>c</sup> Makoto Arisaka,<sup>c</sup> Takuya Nankawa,<sup>c</sup> and Masato Kurihara<sup>\*a,b</sup>

<sup>a</sup>Department of Material and Biological Chemistry, Faculty of Science, Yamagata University, 1-4-12 Kojirakawa-machi, Yamagata 990-8560, Japan.

<sup>b</sup>Nanosystem RI, National Institute of Advanced Industrial Science and Technology, 1-1-1 Higashi, Tsukuba 305-8565, Japan. 10

<sup>c</sup>Research Group for Radiochemistry, Nuclear Science and Engineering Directorate, Japan Atomic Energy Agency, 2-4 Shirakawa Shirane, Tokai-mura, Naka-gun, Ibaraki 319-1195, Japan.

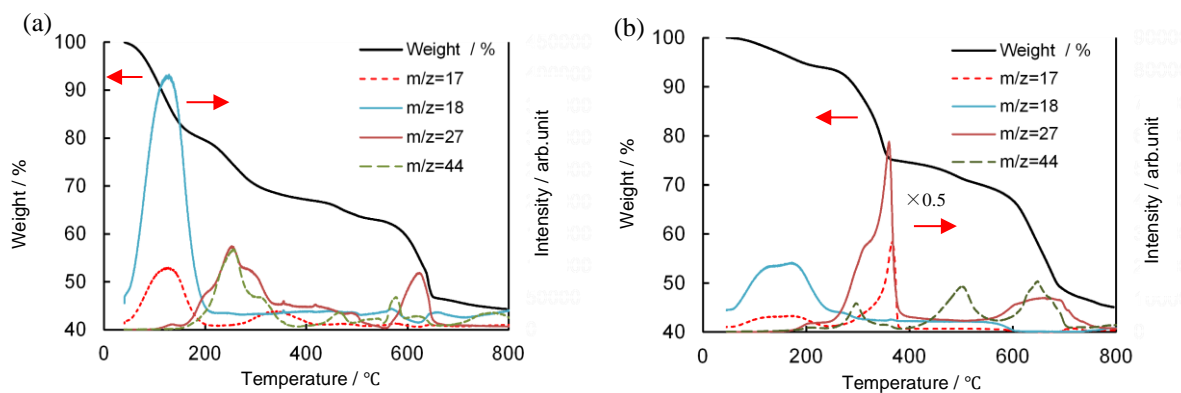

Fig. S1. TG-mass results of (a) the prepared PB-1 and (b) the commercially obtained PB-2. Signal intensity of  $m/z = 18$  (H<sub>2</sub>O) and 17 (NH<sub>3</sub>). The other signals are probably due to thermal decomposition of PB.

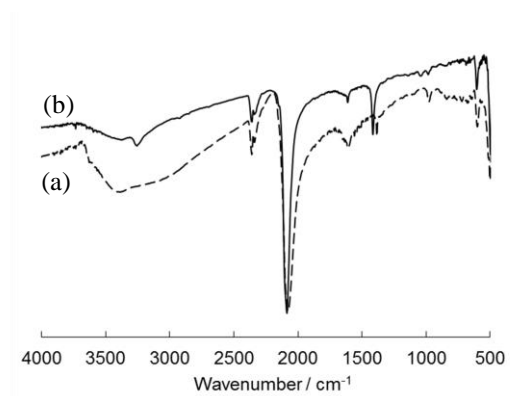

Fig. S2. FT-IR spectra of (a) the prepared PB-1 and (b) the commercially obtained PB-2.

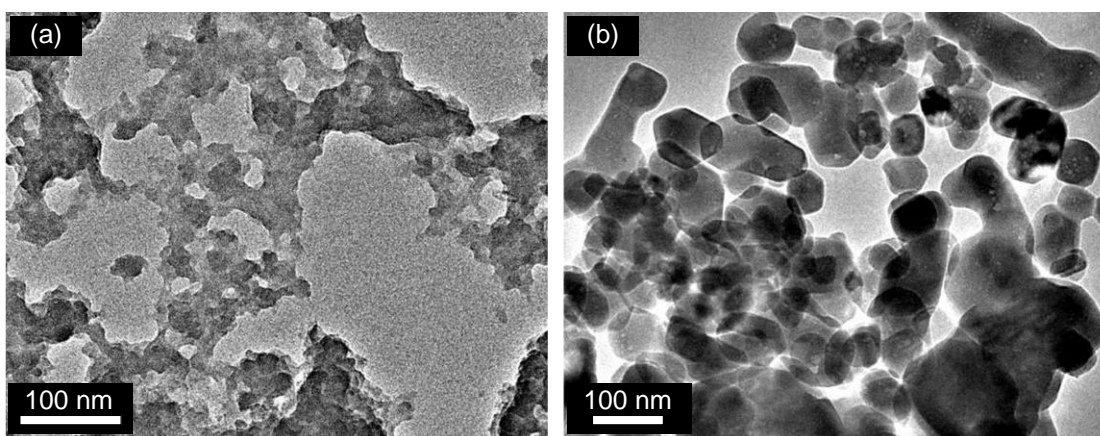

Fig. S3. FE-TEM images of (a) the prepared PB-1 and (b) the commercially obtained PB-2.

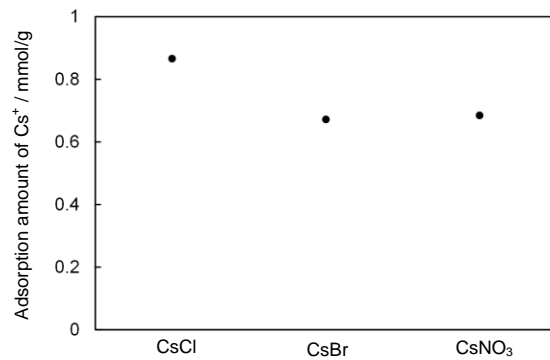

Fig. S4 The adsorption amounts (mmol) of Cs<sup>+</sup> per 1.0 g of PB-1 with various counter anions of Cl<sup>-</sup>, Br<sup>-</sup>, and NO<sub>3</sub><sup>-</sup> after stirring for 30 min.
